# Supplementary material for: Contribution of fine roots on carbon allocation patterns in Norwegian forests
Source: Copernicus journal article supplement (doi:10.5194/egusphere-2025-6380), 2026-01-20
Supplement: Supplementary file 1 [file egusphere-2025-6380-supplement.pdf]

# **Contribution of fine roots on carbon allocation patterns in Norwegian forests**

Andreas Hagenbo, Ryan M. Bright, Christian Wilhelm Mohr, Marius Hauglin, Simon Weldon, Lise  
5 Dalsgaard

**Table S1 Vegetation biomass look-up table according to the Norwegian GHG accounting**

| Stand age range | Norway spruce (kg ha <sup>-1</sup> ) |         |                  |        | Scot spine (kg ha <sup>-1</sup> ) |         |                  |        | Deciduous (kg ha <sup>-1</sup> ) |         |                  |        |
|-----------------|--------------------------------------|---------|------------------|--------|-----------------------------------|---------|------------------|--------|----------------------------------|---------|------------------|--------|
|                 | Mosses                               | Lichens | Herbaceous plant | Shrubs | Mosses                            | Lichens | Herbaceous plant | Shrubs | Mosses                           | Lichens | Herbaceous plant | Shrubs |
| <15             | 700                                  | 0       | 200              | 200    | 1125                              | 350     | 200              | 450    | 425                              | 0       | 350              | 120    |
| 15 - 30         | 800                                  | 0       | 200              | 200    | 1300                              | 350     | 200              | 500    | 400                              | 0       | 225              | 130    |
| 30 - 45         | 900                                  | 0       | 150              | 200    | 1400                              | 350     | 150              | 550    | 375                              | 0       | 125              | 140    |
| 45 - 60         | 1050                                 | 0       | 125              | 200    | 1500                              | 350     | 125              | 600    | 350                              | 0       | 100              | 150    |
| 60 - 75         | 1200                                 | 0       | 100              | 250    | 1525                              | 350     | 100              | 700    | 330                              | 0       | 75               | 160    |
| 75 - 90         | 1300                                 | 0       | 100              | 250    | 1550                              | 350     | 100              | 750    | 325                              | 0       | 50               | 175    |
| 90 - 105        | 1500                                 | 0       | 75               | 250    | 1600                              | 300     | 75               | 800    | 300                              | 0       | 50               | 200    |
| 105 - 120       | 1600                                 | 0       | 50               | 250    | 1700                              | 300     | 50               | 800    | 300                              | 0       | 50               | 200    |
| >120            | 2000                                 | 0       | 50               | 250    | 1700                              | 300     | 50               | 750    | 300                              | 0       | 50               | 200    |

10 **Table S2 Vegetation biomass turnover rates according to the Norwegian GHG accounting**

| Vegetation component | Turnover (times yr <sup>-1</sup> ) |                     | Comment                                                         |
|----------------------|------------------------------------|---------------------|-----------------------------------------------------------------|
|                      | Aboveground biomass                | Belowground biomass |                                                                 |
| Mosses               | 0.33                               | –                   |                                                                 |
| Lichen               | 0.1                                | –                   |                                                                 |
| Herbaceous plant     | 1                                  | 0.33                | Belowground biomass is assumed to be 2x the aboveground biomass |
| Shrubs               | 0.25                               | 0.33                |                                                                 |

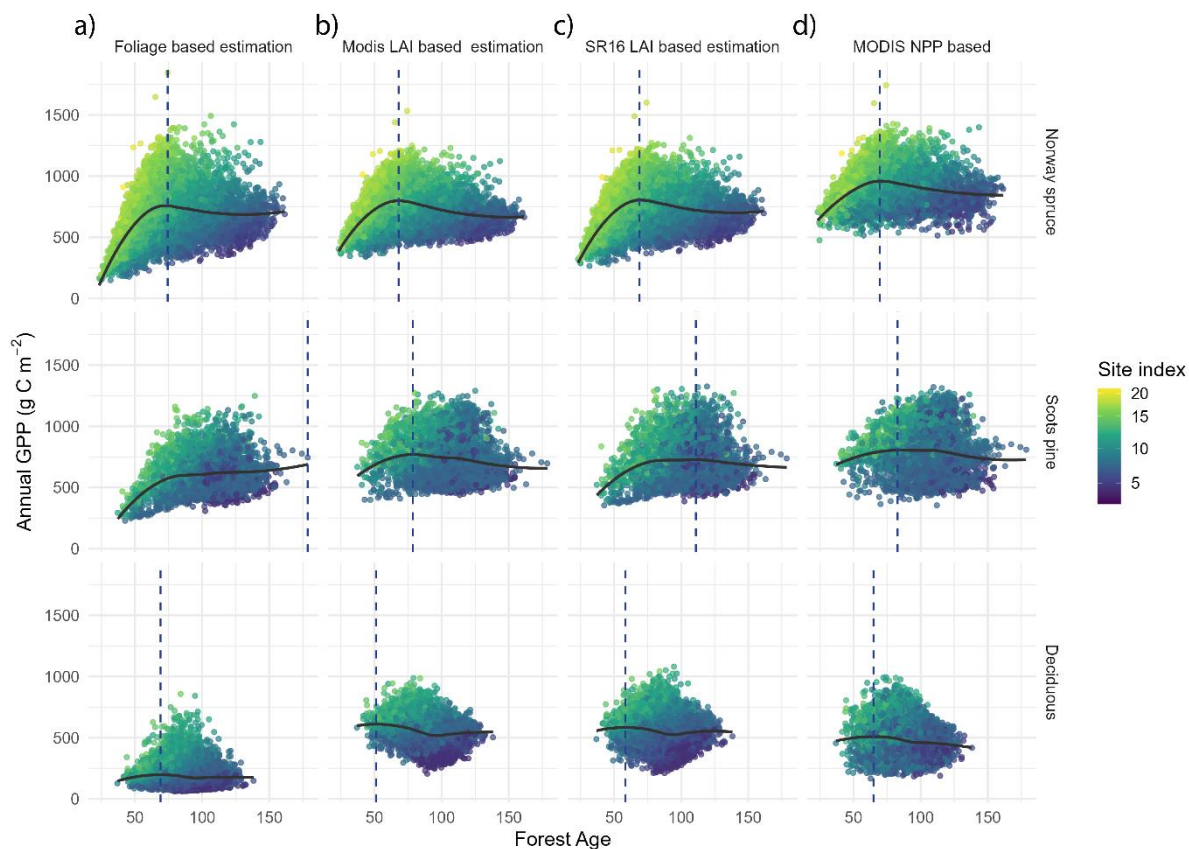

15 **Figure S1: Relationships between total annual gross primary production (GPP) and forest age across Norwegian forests dominated**  
**by Norway spruce, Scots pine, or deciduous trees (primarily *Betula* spp.). GPP represents total carbon fixed by plants through**  
**photosynthesis, including carbon incorporated into plant biomass and lost via respiration. Panels (a-c) present GPP estimates based**  
**on data from the Norwegian Forest Resources Map SR16, with different methods for estimating fine root biomass and production.**  
**The foliage-based method used allometric foliage biomass estimates, and the two LAI-based methods used LAI and specific leaf area**  
 20 **values. LAI data came from either MODIS (column b; MODIS LAI) or optically scaled SR16 LAI (column c). Column (d) displays**  
**GPP from MODIS Euro NPP data, following a similar approach to the MODIS algorithm for GPP estimation, including ecosystem**  
**respiration based on biomass estimates. Solid lines in all panels represent LOESS regression to show the non-linear development of**  
**GPP with forest age, with the color gradient reflecting site index (a proxy for fertility) and site index values log10 transformed in all**  
**panels.**

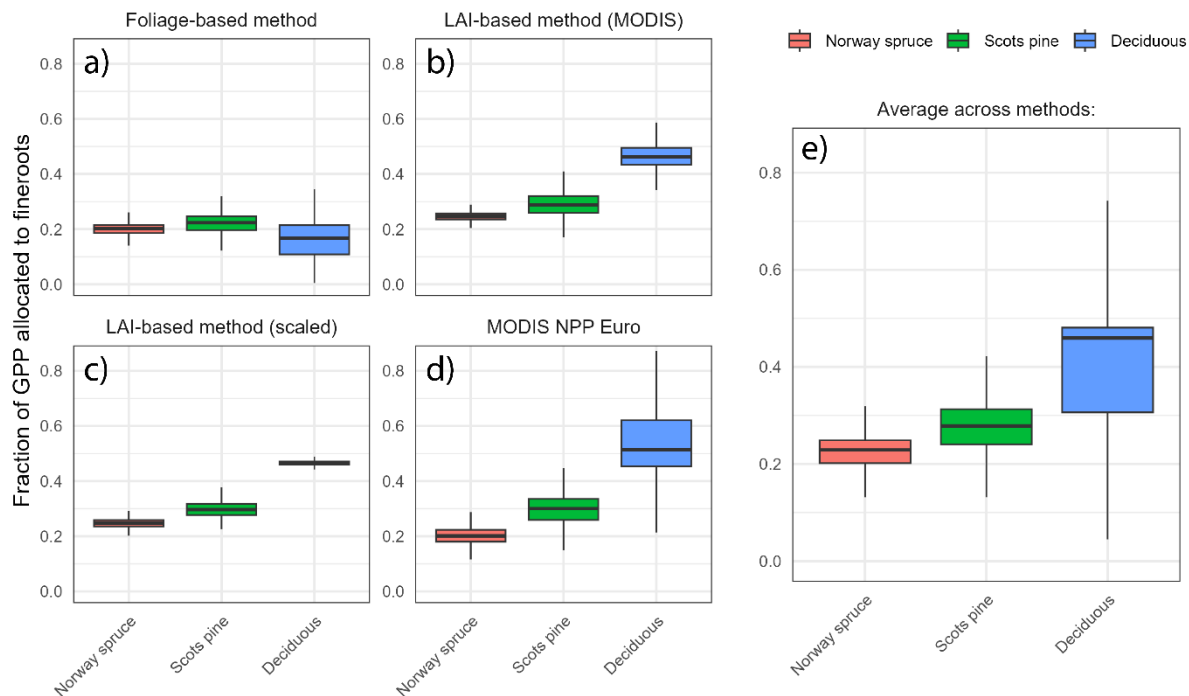

**Figure S2: Fraction of gross primary production (GPP) allocated to fine roots, estimated using three methods for determining foliage biomass and related fine root dynamics. All values rely on ratios of foliage-to-fine root biomass. The foliage-based method (a) used allometric estimates of foliage biomass, while the two LAI-based methods (b-c) used specific leaf area values for biomass calculation. Panel (d) incorporates MODIS LAI and NPP data, in contrast to panels (a-c), which used SR16 data for NPP estimation. Panel (e) shows the mean estimated fraction of GPP allocated to fine roots across all methods.**

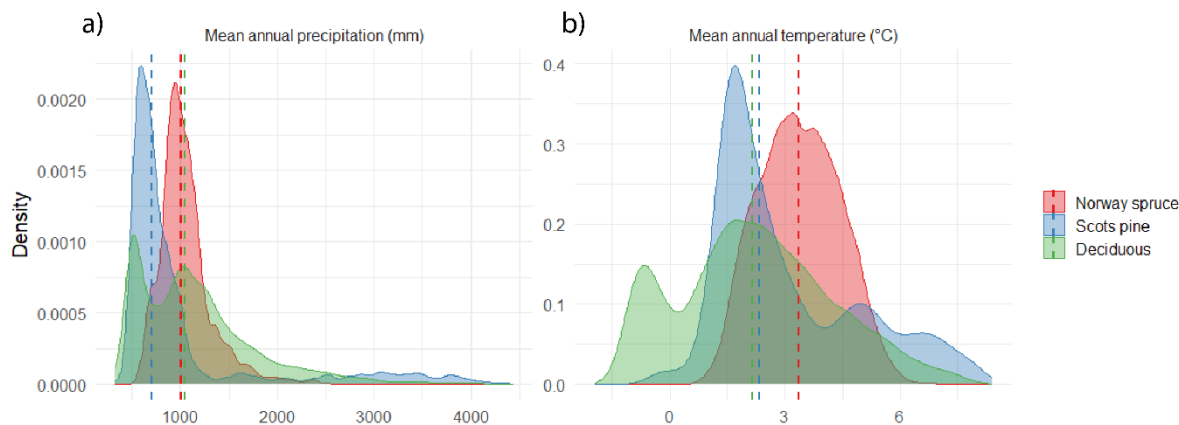

**Figure S3: Density distributions of mean annual precipitation (a) and temperature (b). Vertical lines indicates the median values of the density distributions.**
